# Supplementary material for: Evidence of dark oxygen production at the abyssal seafloor
Source: Nat Geosci. 2024 Jul 22;17(8):737–9. doi: 10.1038/s41561-024-01480-8 (PMC13061637; doi:10.1038/s41561-024-01480-8)
Supplement: Supplementary file 3 — Voltages (V) measured on the surface of nodules from the NORI-D, UK1 and BGR license areas. [file 41561_2024_1480_MOESM3_ESM.xlsx]

## Sheet: Sheet1
Voltage (V)	Nodule 1	Nodule 2	Nodule 3	Nodule 4	Nodule 5	Nodule 6	Nodule 7	Nodule 8	Nodule 6 (cold)	Nodule 7 (cold)	Nodule 9	Nodule 10	Nodule 11	Nodule 12	Control rock	Nodule 1(between two nodules)	Nodule 2 (between two nodules)
Background measurement	0.00303006	0.00157466	0.00164225	0.000963515	0.000873458	0.00188747	0.00648255	0.00625455	0.000766554	0.00319861	0.000377957	0.00193601	0.000494619	0.013614	0.00612115	0.00460409	0.00514152
Replicate measurement 1	0.00508454	0.0192338	0.00736368	0.00323336	0.00156656	0.0614991	0.0786792	0.0116442	0.0667037	0.0118016	0.0353031	0.00372721	0.0877761	0.0313604	0.00715271	0.013446	0.00920576
Replicate measurement 2	0.0091769	0.0203412	0.0209388	0.00444222	0.000143911	0.0987499	0.0815399	0.0283265	0.0416927	0.0246653	0.141086	0.0651002	0.0640936	0.044436	0.00548902	0.0114442	0.044438
Replicate measurement 3	0.0131455	0.00376093	0.0276034	0.00262868	0.00519609	0.101871	0.082213	0.00624245	0.0587345	0.0267096	0.239949	0.0468448	0.0213984	0.0447271	0.00474418	0.0105818	0.0396153
Replicate measurement 4	0.0100952	0.00257692	0.0303758	0.0226831	0.0275601	0.0956816	0.0475936	0.0386825	0.0559916	0.0382614	0.0434002	0.0334628		0.047572	0.00203453	0.00553097	0.0388003
Replicate measurement 5	0.0083485	0.00245494	0.0331228	0.0226273	0.0168738	0.059889	0.0247408	0.0522825	0.0633244	0.0323067	0.0267625	0.0191563		0.0509607	0.00477496	0.0290245	0.0237067
Replicate measurement 6	0.00146442	0.00674232	0.0102119	0.0145364	0.0237942	0.0688965	0.0749928	0.0413104	0.122665	0.0774019				0.0733812	0.00153392	0.0135149	0.0220545
Replicate measurement 7	0.00168725	0.00364689	0.00603382	0.0146565	0.00106023	0.0729194	0.0784055	0.0537913	0.0941521	0.0726022					0.00186196	0.0105793	0.0347411
Replicate measurement 8	0.0223421	0.0010249	0.0186367	0.017556	0.0158344	0.068774	0.0831719	0.00641331	0.0639199	0.0578338					0.000169431	0.0144455	0.0308043
Replicate measurement 9	0.00668173	0.000551241	0.00628345	0.00224585	0.00997475	0.0360534	0.0819095	0.00905277		0.0633104					0.00231619	0.0133985	0.0553369
Replicate measurement 10	0.00648069	0.0107445	0.00341826	0.0260441	0.0254465	0.104028	0.0218202	0.0321268		0.0658233					0.00512674	0.0225648	0.0482791
Replicate measurement 11	0.00671355	0.00543116		0.0339293	0.0138212		0.0271749	0.0381406
Replicate measurement 12	0.00179048	0.00642795		0.0287587	0.0174704		0.030334	0.0381406
Replicate measurement 13	0.00206924	0.00366035		0.0296182	0.0299002		0.00963888	0.0624386
Replicate measurement 14	0.00907214	0.00549745		0.029919	0.0255886		0.0188248	0.0614635
Replicate measurement 15	0.00222755	0.00517631		0.0181069			0.00180259	0.0520273
Replicate measurement 16	0.00416976	0.00385331		0.0177837			0.00628515	0.0779783
Replicate measurement 17	0.0034804	0.001457		0.0231587			0.00600016	0.0800158
Replicate measurement 18	0.00964452	0.000465508		0.0164442			0.0193149	0.0670091
Replicate measurement 19	0.00743497	0.00135467		0.0223478			0.0265466	0.0509574
Replicate measurement 20	0.0118518	0.0127929		0.0328514			0.0216724	0.0509574
